# Supplementary material
Source: publisher figshare collection journal article supplement (https://acs.figshare.com/ndownloader/files/15051734)
Supplement: Supplementary file 1 [file 15051734]

## Sheet: Scottish varieties
	MaA		CiA		QuA		AsA		total simple organic acids		Suc		Fru		Glu		total sugars		De-Glu		De-Rut		De-coGlu		total De		Cy-Glu		Cy-Rut		Cy-Ara		Cy-coGlu		total Cy		Pt-Glu		Pt-Rut		total Pt		Pl-Glu		Pl-Rut		total Pl		Po-Glu
concentration (mg/100g)	Mean	SD	Mean	SD	Mean	SD	Mean	SD	Mean	SD	Mean	SD	Mean	SD	Mean	SD	Mean	SD	Mean	SD	Mean	SD	Mean	SD	Mean	SD	Mean	SD	Mean	SD	Mean	SD	Mean	SD	Mean	SD	Mean	SD	Mean	SD	Mean	SD	Mean	SD	Mean	SD	Mean	SD	Mean
Ben Dorain_2014	477.913	20.1562	3711.26	232.798	16.4545	3.49441	118.039	32.3981	4323.66	233.306	430.523	45.0532	7885.87	162.085	5444.87	232.564	13761.3	291.713	286.169	18.8245	950.523	50.1406	22.117	3.34061	1258.81	60.742	87.0617	8.13415	672.801	16.6152	17.0832	0.67358	18.5446	0.939204	795.491	24.9187	8.21589	0.117791	6.02238	0.334052	14.2383	0.45169	19.3333	1.21958	6.29123	0.14033	25.6245	1.08025	7.02651
Ben Dorain_2015	564.16	77.783	4347.2	340.012	27.7962	1.54096	117.485	18.0119	5056.64	405.717	344.278	68.3583	11714.4	285.492	8306.82	291.079	20365.5	524.524	197.717	9.23628	723.57	4.36126	9.87275	0.258074	931.159	11.954	86.1473	11.3795	620.638	58.5416	15.5072	0.292975	14.9559	0.235045	737.249	66.7508	6.95001	0.377273	5.68518	0.35022	12.6352	0.673515	15.6992	1.55782	6.04885	0.208707	21.7481	1.71509	8.35264
Ben Gairn_2014	223.718	13.8411	1980.02	17.1352	12.7522	1.13128	58.2788	3.03655	2274.77	4.70395	574.508	44.4168	5256.27	301.851	4228.68	198.509	10059.5	540.27	168.159	32.2191	622.191	160.114	12.982	2.86012	803.332	195.102	45.49	5.01843	380.896	87.9149	0	0	14.3016	0.887742	440.688	93.5732	6.48583	0.601875	7.47596	0.876903	13.9618	1.47065	13.77	2.88429	5.69196	0.456336	19.462	3.32681	5.46417
Ben Gairn_2015	281.99	29.3915	3281.81	359.194	29.3859	0.749859	67.3898	33.0037	3660.58	399.765	450.396	34.8267	9914.05	267.649	7512.76	81.8089	17877.2	378.003	252.988	64.9661	757.076	131.178	10.4709	1.15489	1020.53	186.934	91.0944	19.112	547.836	94.9765	0	0	14.1028	0.596826	653.034	111.222	7.76856	1.08005	10.758	1.77175	18.5266	2.78243	18.6083	2.89	6.01488	0.415575	24.6232	3.26633	6.2049
Ben Hope_2014	310.593	34.5232	2430.8	298.174	10.4555	2.12875	135.357	30.8564	2887.21	352.929	372.58	32.1905	5110.78	616.877	3537.74	446.153	9021.09	1084.86	369.14	13.7824	1077.51	54.2493	22.0953	1.29112	1468.74	42.6229	125.292	7.70311	817.036	17.4866	18.4482	0.27121	21.2118	0.660306	981.988	20.3335	8.95365	0.299286	7.40354	0.384108	16.3572	0.492772	19.9761	2.67103	7.79614	0.441294	27.7722	2.53017	9.17214
Ben Hope_2015	445.891	78.8517	2087.71	113.728	24.0781	4.24237	168.985	41.5382	2726.67	219.415	503.909	69.6236	11256.9	1033.81	7276.44	1068.18	19037.2	2053.83	134.98	15.1041	556.116	29.3542	8.60849	0.7235	699.705	43.9154	62.7479	3.90888	474.441	13.8154	15.9915	0.570045	15.3616	0.610442	568.542	18.4614	6.22261	0.282531	0	0	6.22261	0.282531	11.5893	0.791289	5.86336	0.290701	17.4526	1.0195	7.78579
Ben Starav_2014	205.315	53.2851	2396.8	288.891	15.9274	4.12718	90.2229	17.0634	2708.26	357.175	504.53	76.7646	6250.84	733.276	4105.65	569.559	10861	1370.42	272.02	30.7792	797.239	72.1567	17.8002	2.89999	1087.06	105.764	84.832	8.80682	585.672	49.6291	15.7743	0.443621	17.2155	0.932756	703.494	59.7195	8.13056	0.629551	5.67859	0.42629	13.8092	0.920334	19.4003	2.89592	6.51995	0.166031	25.9203	2.79932	7.25819
Ben Starav_2015	358.275	46.7574	4232.22	326.34	30.1603	3.52911	126.467	5.34703	4747.12	377.58	991.454	78.899	11521.4	596.072	8051.51	1277.8	20564.3	1783.52	144.435	2.65207	569.016	20.4551	10.2288	0.24721	723.68	21.0185	69.7817	2.49134	485.367	26.6915	15.6269	0.344074	15.9162	0.479626	586.692	29.557	6.86623	0.322659	5.65333	0.132668	12.5196	0.453222	11.6347	0.653651	6.15063	0.37305	17.7853	0.759068	7.96633
Ben Tirran_2014	305.891	24.2614	4835.2	110.544	13.1396	1.38507	167.795	15.548	5322.03	72.5697	296.592	18.4008	7313.96	440.669	5507.46	306.012	13118	740.189	238.236	37.9501	695.62	129.776	49.9295	10.3846	983.785	178.058	72.6869	11.807	461.051	100.827	16.8006	0.695988	27.2494	3.6252	577.788	116.686	7.39192	0.42964	6.32558	0.381915	13.7175	0.805252	14.1754	1.72583	7.19242	0.460753	21.3678	2.14737	6.93664
Ben Tirran_2015	504.387	20.1425	4401.97	413.495	23.6007	1.7706	233.278	6.885	5163.24	397.773	859.797	244.851	12433	161.985	8849.3	543.381	22142.1	315.059	214.023	10.852	633.461	25.0758	42.9347	3.30847	890.418	33.8171	71.2754	3.35399	462.557	16.3577	17.1924	0.450249	25.9931	0.944649	577.018	18.3771	7.17133	0.142735	5.96835	0.144755	13.1397	0.240518	13.8534	0.839853	7.94874	0.524194	21.8022	1.35557	7.57883
Ben Tron_2014	267.68	16.1403	3730.4	93.8169	12.5762	0.795243	131.154	22.2725	4141.81	66.4433	87.4996	9.28717	8291.01	194.205	6529.57	99.8853	14908.1	294.298	379.838	74.4111	1062.66	127.486	36.6371	4.50144	1479.14	196.71	97.8709	17.3579	632.527	83.9644	19.7197	1.22577	24.323	1.51636	774.44	102.281	11.5119	1.02912	7.3326	0.615259	18.8445	1.44059	33.3538	1.91988	7.69213	0.876587	41.046	2.67278	8.47548
Ben Tron_2015	264.87	24.9189	3221.64	167.388	15.6302	2.71981	77.7464	9.96045	3579.89	202.149	50.3427	13.1503	11478.3	247.852	8057.31	145.065	19586	262.588	259.398	27.5745	1294.51	69.3534	19.883	0.533162	1573.79	96.7418	95.5209	5.43705	881.187	27.7217	19.6093	0.108713	20.9223	0.301513	1017.24	30.8179	9.18667	0.507185	7.30825	0.265965	16.4949	0.772724	37.4211	3.89321	8.17812	0.0622677	45.5992	3.95188	9.50145
S 18/2/23_2014	412.839	11.4422	4026.25	190.123	15.3948	0.768075	131.176	8.8962	4585.66	181.743	320.054	31.0088	5437.67	269.594	4534.07	231.329	10291.8	512.249	107.854	19.1137	180.039	27.6711	9.26238	0.383757	297.155	47.1568	38.9665	5.4289	117.08	23.0595	15.8666	0.50761	16.0082	0.448273	187.921	29.2982	6.51321	0.193615	0	0	6.51321	0.193615	9.21765	0.771715	6.33469	0.336394	15.5523	1.10395	5.61561
S 18/2/23_2015	362.719	35.7291	2943.47	179.591	14.371	1.99954	100.105	7.72846	3420.67	222.47	612.517	80.734	7584.63	928.817	5789.46	871.417	13986.6	1792.2	92.9263	11.6265	221.083	23.4388	7.69298	0.649524	321.703	35.7076	46.2334	2.6572	214.381	18.9403	14.9881	0.228416	15.0869	0.286345	290.689	21.6205	6.46877	0.309786	0	0	6.46877	0.309786	10.7955	0.650602	5.86901	0.170762	16.6645	0.775782	5.65069
Ben Finlay_2014	245.202	59.2274	2282.37	314.275	14.5268	1.6788	137.323	22.6868	2679.42	397.868	45.4822	1.64892	3844.38	43.3062	2732.48	25.657	6622.35	16.0002	243.243	33.9831	533.546	24.1237	14.4439	0.00450714	791.233	58.1024	66.2552	5.96617	348.895	15.7549	15.4215	0.340857	15.8196	0.624587	446.391	10.7542	7.70073	0.133617	5.41591	0.0537286	13.1166	0.187346	13.6379	0.331186	5.68636	0.118802	19.3242	0.449988	5.64564
Ben Finlay_2015	453.732	19.5798	2760.79	54.8748	28.077	2.12264	175.995	4.23498	3418.59	33.1827	181.843	24.0344	6809.16	182.479	4306.59	111.147	11297.6	269.592	382.056	37.7193	596.472	50.2025	13.0263	0.30179	991.554	88.2235	239.96	50.6707	684.39	48.8946	18.0232	0.264396	18.894	0.042046	961.267	99.8718	9.60652	0.317082	10.1385	1.71706	19.745	2.03414	17.2834	1.90067	8.24342	0.348583	25.5268	1.55208	8.24947
9154-3_2014	467.396	46.3527	1681.77	85.6719	11.856	1.36533	69.1777	12.7196	2230.2	106.394	44.0456	1.99778	5060.29	75.3932	4420.66	131.827	9525	187.722	161.113	30.9306	475.037	97.6491	8.00907	0.16391	644.159	128.047	54.1507	6.86416	374.504	75.1428	16.014	0.153684	15.5371	0.21769	460.206	81.8625	6.9928	0.211512	5.56996	0.0534165	12.5628	0.257282	14.6983	1.22326	5.78981	0.143536	20.4881	1.30426	6.48764
9154-3_2015	430.091	37.2645	2818.69	116.932	23.7813	3.25475	87.8854	36.0378	3360.45	152.565	226.767	27.4509	8152.41	358.857	5875.17	209.077	14254.4	594.352	78.8608	4.06802	183.777	19.6646	6.08739	0.204398	268.726	22.6991	59.2628	6.01788	239.504	22.596	14.5069	0.378071	14.4614	0.371932	327.735	20.5442	5.87848	0.215939	6.68803	0.704505	12.5665	0.554868	8.65496	0.525519	5.26559	0.121851	13.9206	0.646814	6.39286
[truncated: 111 more columns]

## Sheet: Lithuanian varieties
	MaA		CiA		QuA		AsA		total simple organic acids		Suc		Fru		Glu		total sugars		De-Glu		De-Rut		De-coGlu		total De		Cy-Glu		Cy-Rut		Cy-Ara		Cy-coGlu		total Cy		Pt-Glu		Pt-Rut		total Pt		Pl-Glu		Pl-Rut		total Pl		Po-Glu
concentration (mg/100g)	Mean	SD	Mean	SD	Mean	SD	Mean	SD	Mean	SD	Mean	SD	Mean	SD	Mean	SD	Mean	SD	Mean	SD	Mean	SD	Mean	SD	Mean	SD	Mean	SD	Mean	SD	Mean	SD	Mean	SD	Mean	SD	Mean	SD	Mean	SD	Mean	SD	Mean	SD	Mean	SD	Mean	SD	Mean
Almiai_2014	292.564	22.8838	3823.5	356.103	23.3088	3.20134	185.3	19.5857	4324.68	358.839	235.512	25.5981	8428.01	410.906	6195.97	305.506	14859.5	705.633	179.331	14.8605	624.582	66.7445	34.9887	4.22442	838.901	83.4058	69.9778	1.71115	477.356	27.4838	18.3762	0.171979	27.0029	1.35029	592.713	28.3224	8.80312	0.328168	6.68985	0.17348	15.493	0.465464	21.0679	2.50024	7.1987	0.201048	28.2666	2.31005	7.93467
Almiai_2015	358.617	31.6785	4031.4	479.817	23.019	3.82033	89.3304	38.8223	4502.37	548.159	47.4028	5.5401	11593.5	1409.23	8360.74	1184.26	20001.6	2587.65	95.891	10.6281	539.968	34.583	14.0269	0.180158	649.886	45.1551	53.4495	6.09597	446.408	41.8229	18.4499	0.408615	20.4092	0.0679782	538.717	47.9591	7.28953	0.181043	6.5447	0.307804	13.8342	0.426754	13.2745	0.835131	6.98498	0.312259	20.2595	0.850737	8.0016
Dainiai_2014	487.289	31.5495	2246.68	296.026	56.6546	11.0136	112.959	19.289	2903.58	287.692	1207.68	172.764	6883.42	620.495	6188.96	489.588	14280.1	1259.58	181.548	32.9027	508.965	98.116	18.7664	3.7499	709.279	134.2	64.271	7.62482	430.559	65.3146	14.6039	0.570864	17.8338	1.34961	527.268	74.0141	8.55689	0.835044	5.44954	0.336156	14.0064	1.15483	20.3536	3.88198	4.94638	0.190742	25.3	4.00048	8.19368
Dainiai_2015	482.84	21.5324	3316.62	342.568	40.8408	3.42832	91.2261	6.5476	3931.52	366.261	1126.99	50.7432	9578.35	843.945	7452.65	534.229	18158	1297.62	219.41	43.928	641.541	73.3661	12.8547	1.16964	873.806	108.734	120.278	27.7167	766.471	104.926	16.3359	0.34918	18.379	0.623921	921.464	130.503	9.56472	0.783635	6.85338	0.572178	16.4181	1.34963	21.627	0.955885	6.20572	0.122843	27.8327	1.04775	12.3515
Gagatai_2014	244.449	40.5564	1823.65	260.108	9.15298	1.74501	62.6664	14.0503	2139.92	206.08	127.418	9.43791	6650.61	63.2229	5455.98	166.371	12234	195.518	311.442	38.2899	916.367	82.366	60.9776	3.08551	1288.79	120.546	105.947	18.7803	690.389	84.984	18.7984	0.334693	35.8726	0.956859	851.007	103.834	11.3531	0.518641	7.03076	0.156637	18.3838	0.64914	36.847	1.8618	7.13044	0.189625	43.9775	2.04421	8.97099
Gagatai_2015	304.554	58.1505	3423.86	219.297	16.7933	2.64824	33.0903	10.4769	3778.3	195.225	61.7055	9.69766	11184.4	1554.05	8700.95	1170.39	19947	2715.86	133.294	9.79784	660.132	39.9017	13.7415	1.96051	807.168	47.739	76.2538	8.13602	636.841	43.6301	18.1554	0.223482	20.7727	0.79258	752.022	51.197	7.72715	0.192549	6.86999	0.237622	14.5971	0.430171	18.4778	0.641357	6.80769	0.363725	25.2855	1.00508	8.98457
Joniniai_2014	429.813	23.1338	3172.18	188.791	36.7642	2.97292	251.534	12.5911	3890.29	203.517	730.764	181.441	7471.19	728.607	6720.99	671.694	14922.9	1411	66.8416	3.20914	321.526	59.7752	17.8306	2.70864	406.198	63.3096	31.8585	1.80962	269.596	16.1959	15.2079	0.437974	18.8615	0.670304	335.523	15.6971	6.51797	0.122102	5.6035	0.209264	12.1215	0.328401	18.1637	1.99754	5.72545	0.138725	23.8892	2.13251	6.46921
Joniniai_2015	450.648	37.0421	3724.05	57.734	58.0689	10.2891	217.461	31.1002	4450.23	126.059	374.041	50.0319	9944.58	386.549	8285.33	345.663	18604	768.788	66.1278	9.38602	370.368	40.152	9.58604	0.116964	446.082	32.7351	48.9037	13.6366	470.291	69.3483	15.2723	0.514022	16.9632	0.862984	551.43	82.4737	6.5694	0.482953	5.65693	0.306362	12.2263	0.781523	17.6655	1.27765	6.02845	0.145776	23.6939	1.23975	7.83721
Tauriai_2014	340.7	10.4416	2419.15	333.64	23.6687	6.41483	115.504	41.8339	2899.03	382.97	492.679	76.8672	8757.2	744.657	6932.9	724.149	16182.8	1521.25	183.543	10.4071	351.963	11.0613	12.0176	0.257733	547.524	18.4662	64.1568	5.43532	315.031	22.7665	14.7277	0.0981009	15.9183	0.0998175	409.834	28.1161	11.6077	0.413672	5.709	0.0139374	17.3166	0.423624	28.5343	2.01633	5.21077	0.108541	33.745	2.0132	6.74645
Tauriai_2015	385.162	43.6974	4641.07	516.951	29.7786	6.69342	119.282	21.1266	5175.29	522.368	305.07	39.2994	11808.5	1300.96	9959.52	1067.69	22073.1	2355.23	117.119	14.253	311.13	20.6883	8.61252	0.442406	436.862	31.0616	47.8711	4.03037	254.339	18.6578	15.8451	0.42068	16.4441	0.411235	334.499	21.8918	8.52198	0.12338	5.96727	0.199044	14.4893	0.291037	19.938	2.33737	5.96538	0.224536	25.9034	2.12822	7.60572
[truncated: 111 more columns]

## Sheet: Latvian varieties
	MaA		CiA		QuA		AsA		total simple organic acids		Suc		Fru		Glu		total sugars		De-Glu		De-Rut		De-coGlu		total De		Cy-Glu		Cy-Rut		Cy-Ara		Cy-coGlu		total Cy		Pt-Glu		Pt-Rut		total Pt		Pl-Glu		Pl-Rut		total Pl		Po-Glu
concentration (mg/100g)	Mean	SD	Mean	SD	Mean	SD	Mean	SD	Mean	SD	Mean	SD	Mean	SD	Mean	SD	Mean	SD	Mean	SD	Mean	SD	Mean	SD	Mean	SD	Mean	SD	Mean	SD	Mean	SD	Mean	SD	Mean	SD	Mean	SD	Mean	SD	Mean	SD	Mean	SD	Mean	SD	Mean	SD	Mean
Mara_2014	120.276	10.342	3089.89	112.76	7.08694	0.865117	88.9431	26.6899	3306.2	127.081	147.592	28.5242	7659.15	1667.79	5356.89	1324.05	13163.6	3013.91	461.307	22.9485	1204.11	24.8371	38.4729	2.52112	1703.89	37.3415	106.42	5.18062	690.759	18.6198	19.5231	0.0838054	23.4453	0.352885	840.147	23.4275	10.8223	0.394251	7.47628	0.221038	18.2986	0.6114	28.936	2.41368	9.06647	0.342154	38.0025	2.2956	7.80726
Mara_2015	158.044	15.1936	6422.25	366.858	8.97726	2.36518	63.6253	2.65908	6652.9	382.228	51.857	3.22193	11634.3	732.394	8535.71	810.892	20221.9	1307.4	95.0757	11.1275	441.195	36.127	13.3841	0.908697	549.655	45.9101	38.3476	2.34787	251.589	21.7586	19.5502	0.207199	20.1218	0.274289	329.609	24.2402	7.77806	0.0770011	7.23056	0.152771	15.0086	0.228811	15.7879	1.72563	7.19605	0.0704907	22.984	1.78402	7.63805
[truncated: 111 more columns]

## Sheet: Finnish varieties
	MaA		CiA		QuA		AsA		total simple organic acids		Suc		Fru		Glu		total sugars		De-Glu		De-Rut		De-coGlu		total De		Cy-Glu		Cy-Rut		Cy-Ara		Cy-coGlu		total Cy		Pt-Glu		Pt-Rut		total Pt		Pl-Glu		Pl-Rut		total Pl		Po-Glu
concentration (mg/100g)	Mean	SD	Mean	SD	Mean	SD	Mean	SD	Mean	SD	Mean	SD	Mean	SD	Mean	SD	Mean	SD	Mean	SD	Mean	SD	Mean	SD	Mean	SD	Mean	SD	Mean	SD	Mean	SD	Mean	SD	Mean	SD	Mean	SD	Mean	SD	Mean	SD	Mean	SD	Mean	SD	Mean	SD	Mean
Marski_2014	187.049	6.10021	2126.38	249.288	18.1743	1.42254	25.1563	6.34906	2356.76	250.711	310.356	63.8841	6553.67	804.472	5975.69	724.786	12839.7	1504.72	514.558	15.657	1125.82	38.738	35.6846	9.03903	1676.07	30.006	111.789	2.48758	641.959	7.36025	18.2914	0.527159	20.12	1.42079	792.159	6.23241	12.1856	1.22136	0	0	12.1856	1.22136	29.9058	3.6628	7.35266	0.512138	37.2584	3.23062	6.80689
Marski_2015	338.357	44.7206	3437.58	142.692	27.7159	2.49149	28.7389	8.01429	3832.39	181.182	413.923	34.2318	10622.3	999.696	9118.17	734.417	20154.4	1708.54	239.057	101.797	725.247	293.403	17.3877	6.00158	981.692	401.045	64.2525	20.7947	401.581	168.479	18.1069	1.48222	18.3035	1.59072	502.244	192.331	8.30045	1.15093	0	0	8.30045	1.15093	16.2106	4.80964	7.11597	0.718608	23.3266	5.5258	6.84228
Mikael_2014	84.9191	14.4777	1312.18	64.3412	5.77086	0.831554	21.5891	7.5771	1424.46	58.2895	239.024	44.0953	3404.72	229.217	3113.05	200.077	6756.8	428.009	196.229	7.61344	381.31	15.0132	13.2692	1.0994	590.808	17.7088	99.7748	8.66541	502.079	32.9934	15.7985	0.0294236	17.5712	0.741095	635.224	40.0437	9.10235	0.36619	5.52235	0.186515	14.6247	0.192715	17.1332	0.500234	5.72473	0.174018	22.858	0.553849	5.7339
Mikael_2015	231.404	32.2286	3630.21	293.927	19.4193	3.12121	37.4835	13.6585	3918.52	341.385	229.864	16.1755	10769.9	666.826	9232.82	447.674	20232.6	1124.9	110.932	13.0118	265.894	17.2295	9.68737	0.77698	386.513	29.8403	93.6064	6.94703	564.204	2.125	15.3071	0.624065	17.0145	0.518156	690.132	9.90674	7.57867	0.42516	5.52269	0.11613	13.1014	0.540813	10.4353	0.980827	5.65718	0.244306	16.0925	0.848697	5.96103
Mortti_2014	246.042	49.6641	1401.12	129.641	13.4221	3.72012	46.0317	16.6428	1706.62	186.001	525.781	103.093	5031.51	169.593	4696.06	202.678	10253.4	409.63	181.324	11.6272	464.737	10.9588	14.106	1.06563	660.167	22.9481	47.409	1.48935	285.962	3.83133	13.0318	0.261078	13.9502	0.18119	360.353	4.68056	6.93919	0.18282	4.72587	0.363633	11.6651	0.544119	14.253	0.696103	4.81144	0.312863	19.0644	0.41926	5.43439
Mortti_2015	355.431	73.1629	2826.82	32.236	23.7009	6.02102	62.3642	31.2605	3268.31	92.7363	560.123	27.5249	10744.8	839.351	8805.2	1023.94	20110.1	1858.59	104.179	24.9081	339.928	86.6842	8.6628	0.408597	452.77	111.989	40.0307	5.91549	241.437	57.2094	14.4253	0.405583	14.6236	0.30091	310.517	63.7191	6.30093	0.480288	5.119	0.160498	11.4199	0.638539	9.59287	1.6707	5.35577	0.13805	14.9486	1.80751	6.1975
Vilma_2014	164.935	11.3068	1639.16	21.6461	16.2928	1.64547	77.7283	12.6028	1898.12	3.85394	674.953	68.8555	6708.44	340.866	5344.18	228.275	12727.6	563.957	0	0	0	0	0	0	0	0	0	0	0	0	0	0	0	0	0	0	0	0	0	0	0	0	0	0	0	0	0	0	0
Vilma_2015	237.643	30.2191	2761.26	258.206	22.6269	1.80044	68.1451	2.92248	3089.67	232.514	466.759	49.5103	12066.4	189.413	9755.95	210.115	22289.1	337.109	0	0	0	0	0	0	0	0	0	0	0	0	0	0	0	0	0	0	0	0	0	0	0	0	0	0	0	0	0	0	0
Venny_2014	204.318	24.1363	1975.95	83.8886	29.8168	6.19243	119.975	12.9142	2330.06	82.1673	258.654	25.3308	7350.07	147.284	4963.15	80.6982	12571.9	194.19	0	0	0	0	0	0	0	0	0	0	0	0	0	0	0	0	0	0	0	0	0	0	0	0	0	0	0	0	0	0	0
Venny_2015	290.295	41.2245	3285.85	366.199	42.893	3.5524	94.9459	7.3223	3713.99	396.384	92.207	13.5952	9622.78	204.718	6885.4	176.906	16600.4	354.19	0	0	0	0	0	0	0	0	0	0	0	0	0	0	0	0	0	0	0	0	0	0	0	0	0	0	0	0	0	0	0
[truncated: 111 more columns]

## Sheet: Polish varuíeties
	MaA		CiA		QuA		AsA		total simple organic acids		Suc		Fru		Glu		total sugars		De-Glu		De-Rut		De-coGlu		total De		Cy-Glu		Cy-Rut		Cy-Ara		Cy-coGlu		total Cy		Pt-Glu		Pt-Rut		total Pt		Pl-Glu		Pl-Rut		total Pl		Po-Glu
concentration (mg/100g)	Mean	SD	Mean	SD	Mean	SD	Mean	SD	Mean	SD	Mean	SD	Mean	SD	Mean	SD	Mean	SD	Mean	SD	Mean	SD	Mean	SD	Mean	SD	Mean	SD	Mean	SD	Mean	SD	Mean	SD	Mean	SD	Mean	SD	Mean	SD	Mean	SD	Mean	SD	Mean	SD	Mean	SD	Mean
Tisel_2014	284.597	4.94751	1997.08	86.9111	18.7409	0.533547	195.508	8.95235	2495.93	93.1172	358.775	75.0711	6530.48	772.334	4924.02	566.762	11813.3	1279.95	147.253	5.08108	352.49	2.43463	7.13321	0.336242	506.876	7.17947	47.3364	4.97737	292.161	29.8329	12.1419	0.572144	12.2884	0.259285	363.927	35.6417	8.4594	0.649422	4.58429	0.15408	13.0437	0.803502	23.6374	2.58213	4.39352	0.0485835	28.0309	2.63071	6.08065
Tisel_2015	354.165	3.42659	2408.24	293.393	35.3432	1.39488	249.163	8.17841	3046.91	293.789	1676.1	174.674	10619.7	454	8261.66	434.997	20557.5	1057.91	177.084	2.83654	436.537	37.2989	5.51986	0.166746	619.141	39.9687	86.506	3.11118	523.755	54.9547	13.9801	0.161071	13.2909	0.378469	637.532	57.8485	8.97409	0.00604896	6.30572	0.391685	15.2798	0.397734	24.3251	1.27098	5.42087	0.175204	29.7459	1.44619	9.69499
[truncated: 111 more columns]

## Sheet: total
Year 2014	MaA		CiA		QuA		AsA		total simple organic acids		Suc		Fru		Glu		total sugars		De-Glu		De-Rut		De-coGlu		total De		Cy-Glu		Cy-Rut		Cy-Ara		Cy-coGlu		total Cy		Pt-Glu		Pt-Rut		total Pt		Pl-Glu		Pl-Rut		total Pl		Po-Glu
concentration (mg/100g)	Mean	SD	Mean	SD	Mean	SD	Mean	SD	Mean	SD	Mean	SD	Mean	SD	Mean	SD	Mean	SD	Mean	SD	Mean	SD	Mean	SD	Mean	SD	Mean	SD	Mean	SD	Mean	SD	Mean	SD	Mean	SD	Mean	SD	Mean	SD	Mean	SD	Mean	SD	Mean	SD	Mean	SD	Mean
Ben Dorain	477.913	20.1562	3711.26	232.798	16.4545	3.49441	118.039	32.3981	4323.66	233.306	430.523	45.0532	7885.87	162.085	5444.87	232.564	13761.3	291.713	286.169	18.8245	950.523	50.1406	22.117	3.34061	1258.81	60.742	87.0617	8.13415	672.801	16.6152	17.0832	0.67358	18.5446	0.939204	795.491	24.9187	8.21589	0.117791	6.02238	0.334052	14.2383	0.45169	19.3333	1.21958	6.29123	0.14033	25.6245	1.08025	7.02651
Ben Gairn	223.718	13.8411	1980.02	17.1352	12.7522	1.13128	58.2788	3.03655	2274.77	4.70395	574.508	44.4168	5256.27	301.851	4228.68	198.509	10059.5	540.27	168.159	32.2191	622.191	160.114	12.982	2.86012	803.332	195.102	45.49	5.01843	380.896	87.9149	0	0	14.3016	0.887742	440.688	93.5732	6.48583	0.601875	7.47596	0.876903	13.9618	1.47065	13.77	2.88429	5.69196	0.456336	19.462	3.32681	5.46417
Ben Hope	310.593	34.5232	2430.8	298.174	10.4555	2.12875	135.357	30.8564	2887.21	352.929	372.58	32.1905	5110.78	616.877	3537.74	446.153	9021.09	1084.86	369.14	13.7824	1077.51	54.2493	22.0953	1.29112	1468.74	42.6229	125.292	7.70311	817.036	17.4866	18.4482	0.27121	21.2118	0.660306	981.988	20.3335	8.95365	0.299286	7.40354	0.384108	16.3572	0.492772	19.9761	2.67103	7.79614	0.441294	27.7722	2.53017	9.17214
Ben Starav	205.315	53.2851	2396.8	288.891	15.9274	4.12718	90.2229	17.0634	2708.26	357.175	504.53	76.7646	6250.84	733.276	4105.65	569.559	10861	1370.42	272.02	30.7792	797.239	72.1567	17.8002	2.89999	1087.06	105.764	84.832	8.80682	585.672	49.6291	15.7743	0.443621	17.2155	0.932756	703.494	59.7195	8.13056	0.629551	5.67859	0.42629	13.8092	0.920334	19.4003	2.89592	6.51995	0.166031	25.9203	2.79932	7.25819
Ben Tirran	305.891	24.2614	4835.2	110.544	13.1396	1.38507	167.795	15.548	5322.03	72.5697	296.592	18.4008	7313.96	440.669	5507.46	306.012	13118	740.189	238.236	37.9501	695.62	129.776	49.9295	10.3846	983.785	178.058	72.6869	11.807	461.051	100.827	16.8006	0.695988	27.2494	3.6252	577.788	116.686	7.39192	0.42964	6.32558	0.381915	13.7175	0.805252	14.1754	1.72583	7.19242	0.460753	21.3678	2.14737	6.93664
Ben Tron	267.68	16.1403	3730.4	93.8169	12.5762	0.795243	131.154	22.2725	4141.81	66.4433	87.4996	9.28717	8291.01	194.205	6529.57	99.8853	14908.1	294.298	379.838	74.4111	1062.66	127.486	36.6371	4.50144	1479.14	196.71	97.8709	17.3579	632.527	83.9644	19.7197	1.22577	24.323	1.51636	774.44	102.281	11.5119	1.02912	7.3326	0.615259	18.8445	1.44059	33.3538	1.91988	7.69213	0.876587	41.046	2.67278	8.47548
S 18/2/23	412.839	11.4422	4026.25	190.123	15.3948	0.768075	131.176	8.8962	4585.66	181.743	320.054	31.0088	5437.67	269.594	4534.07	231.329	10291.8	512.249	107.854	19.1137	180.039	27.6711	9.26238	0.383757	297.155	47.1568	38.9665	5.4289	117.08	23.0595	15.8666	0.50761	16.0082	0.448273	187.921	29.2982	6.51321	0.193615	0	0	6.51321	0.193615	9.21765	0.771715	6.33469	0.336394	15.5523	1.10395	5.61561
Ben Finlay	245.202	59.2274	2282.37	314.275	14.5268	1.6788	137.323	22.6868	2679.42	397.868	45.4822	1.64892	3844.38	43.3062	2732.48	25.657	6622.35	16.0002	243.243	33.9831	533.546	24.1237	14.4439	0.00450714	791.233	58.1024	66.2552	5.96617	348.895	15.7549	15.4215	0.340857	15.8196	0.624587	446.391	10.7542	7.70073	0.133617	5.41591	0.0537286	13.1166	0.187346	13.6379	0.331186	5.68636	0.118802	19.3242	0.449988	5.64564
9154-3	467.396	46.3527	1681.77	85.6719	11.856	1.36533	69.1777	12.7196	2230.2	106.394	44.0456	1.99778	5060.29	75.3932	4420.66	131.827	9525	187.722	161.113	30.9306	475.037	97.6491	8.00907	0.16391	644.159	128.047	54.1507	6.86416	374.504	75.1428	16.014	0.153684	15.5371	0.21769	460.206	81.8625	6.9928	0.211512	5.56996	0.0534165	12.5628	0.257282	14.6983	1.22326	5.78981	0.143536	20.4881	1.30426	6.48764
Almiai	292.564	22.8838	3823.5	356.103	23.3088	3.20134	185.3	19.5857	4324.68	358.839	235.512	25.5981	8428.01	410.906	6195.97	305.506	14859.5	705.633	179.331	14.8605	624.582	66.7445	34.9887	4.22442	838.901	83.4058	69.9778	1.71115	477.356	27.4838	18.3762	0.171979	27.0029	1.35029	592.713	28.3224	8.80312	0.328168	6.68985	0.17348	15.493	0.465464	21.0679	2.50024	7.1987	0.201048	28.2666	2.31005	7.93467
Dainiai	487.289	31.5495	2246.68	296.026	56.6546	11.0136	112.959	19.289	2903.58	287.692	1207.68	172.764	6883.42	620.495	6188.96	489.588	14280.1	1259.58	181.548	32.9027	508.965	98.116	18.7664	3.7499	709.279	134.2	64.271	7.62482	430.559	65.3146	14.6039	0.570864	17.8338	1.34961	527.268	74.0141	8.55689	0.835044	5.44954	0.336156	14.0064	1.15483	20.3536	3.88198	4.94638	0.190742	25.3	4.00048	8.19368
Gagatai	244.449	40.5564	1823.65	260.108	9.15298	1.74501	62.6664	14.0503	2139.92	206.08	127.418	9.43791	6650.61	63.2229	5455.98	166.371	12234	195.518	311.442	38.2899	916.367	82.366	60.9776	3.08551	1288.79	120.546	105.947	18.7803	690.389	84.984	18.7984	0.334693	35.8726	0.956859	851.007	103.834	11.3531	0.518641	7.03076	0.156637	18.3838	0.64914	36.847	1.8618	7.13044	0.189625	43.9775	2.04421	8.97099
Joniniai	429.813	23.1338	3172.18	188.791	36.7642	2.97292	251.534	12.5911	3890.29	203.517	730.764	181.441	7471.19	728.607	6720.99	671.694	14922.9	1411	66.8416	3.20914	321.526	59.7752	17.8306	2.70864	406.198	63.3096	31.8585	1.80962	269.596	16.1959	15.2079	0.437974	18.8615	0.670304	335.523	15.6971	6.51797	0.122102	5.6035	0.209264	12.1215	0.328401	18.1637	1.99754	5.72545	0.138725	23.8892	2.13251	6.46921
Tauriai	340.7	10.4416	2419.15	333.64	23.6687	6.41483	115.504	41.8339	2899.03	382.97	492.679	76.8672	8757.2	744.657	6932.9	724.149	16182.8	1521.25	183.543	10.4071	351.963	11.0613	12.0176	0.257733	547.524	18.4662	64.1568	5.43532	315.031	22.7665	14.7277	0.0981009	15.9183	0.0998175	409.834	28.1161	11.6077	0.413672	5.709	0.0139374	17.3166	0.423624	28.5343	2.01633	5.21077	0.108541	33.745	2.0132	6.74645
Mara	120.276	10.342	3089.89	112.76	7.08694	0.865117	88.9431	26.6899	3306.2	127.081	147.592	28.5242	7659.15	1667.79	5356.89	1324.05	13163.6	3013.91	461.307	22.9485	1204.11	24.8371	38.4729	2.52112	1703.89	37.3415	106.42	5.18062	690.759	18.6198	19.5231	0.0838054	23.4453	0.352885	840.147	23.4275	10.8223	0.394251	7.47628	0.221038	18.2986	0.6114	28.936	2.41368	9.06647	0.342154	38.0025	2.2956	7.80726
Marski	187.049	6.10021	2126.38	249.288	18.1743	1.42254	25.1563	6.34906	2356.76	250.711	310.356	63.8841	6553.67	804.472	5975.69	724.786	12839.7	1504.72	514.558	15.657	1125.82	38.738	35.6846	9.03903	1676.07	30.006	111.789	2.48758	641.959	7.36025	18.2914	0.527159	20.12	1.42079	792.159	6.23241	12.1856	1.22136	0	0	12.1856	1.22136	29.9058	3.6628	7.35266	0.512138	37.2584	3.23062	6.80689
Mikael	84.9191	14.4777	1312.18	64.3412	5.77086	0.831554	21.5891	7.5771	1424.46	58.2895	239.024	44.0953	3404.72	229.217	3113.05	200.077	6756.8	428.009	196.229	7.61344	381.31	15.0132	13.2692	1.0994	590.808	17.7088	99.7748	8.66541	502.079	32.9934	15.7985	0.0294236	17.5712	0.741095	635.224	40.0437	9.10235	0.36619	5.52235	0.186515	14.6247	0.192715	17.1332	0.500234	5.72473	0.174018	22.858	0.553849	5.7339
Mortti	246.042	49.6641	1401.12	129.641	13.4221	3.72012	46.0317	16.6428	1706.62	186.001	525.781	103.093	5031.51	169.593	4696.06	202.678	10253.4	409.63	181.324	11.6272	464.737	10.9588	14.106	1.06563	660.167	22.9481	47.409	1.48935	285.962	3.83133	13.0318	0.261078	13.9502	0.18119	360.353	4.68056	6.93919	0.18282	4.72587	0.363633	11.6651	0.544119	14.253	0.696103	4.81144	0.312863	19.0644	0.41926	5.43439
Vilma	164.935	11.3068	1639.16	21.6461	16.2928	1.64547	77.7283	12.6028	1898.12	3.85394	674.953	68.8555	6708.44	340.866	5344.18	228.275	12727.6	563.957	0	0	0	0	0	0	0	0	0	0	0	0	0	0	0	0	0	0	0	0	0	0	0	0	0	0	0	0	0	0	0
Venny	204.318	24.1363	1975.95	83.8886	29.8168	6.19243	119.975	12.9142	2330.06	82.1673	258.654	25.3308	7350.07	147.284	4963.15	80.6982	12571.9	194.19	0	0	0	0	0	0	0	0	0	0	0	0	0	0	0	0	0	0	0	0	0	0	0	0	0	0	0	0	0	0	0
Tisel	284.597	4.94751	1997.08	86.9111	18.7409	0.533547	195.508	8.95235	2495.93	93.1172	358.775	75.0711	6530.48	772.334	4924.02	566.762	11813.3	1279.95	147.253	5.08108	352.49	2.43463	7.13321	0.336242	506.876	7.17947	47.3364	4.97737	292.161	29.8329	12.1419	0.572144	12.2884	0.259285	363.927	35.6417	8.4594	0.649422	4.58429	0.15408	13.0437	0.803502	23.6374	2.58213	4.39352	0.0485835	28.0309	2.63071	6.08065
Year 2015	MaA		CiA		QuA		AsA		total simple organic acids		Suc		Fru		Glu		total sugars		De-Glu		De-Rut		De-coGlu		total De		Cy-Glu		Cy-Rut		Cy-Ara		Cy-coGlu		total Cy		Pt-Glu		Pt-Rut		total Pt		Pl-Glu		Pl-Rut		total Pl		Po-Glu
concentration (mg/100g)	Mean	SD	Mean	SD	Mean	SD	Mean	SD	Mean	SD	Mean	SD	Mean	SD	Mean	SD	Mean	SD	Mean	SD	Mean	SD	Mean	SD	Mean	SD	Mean	SD	Mean	SD	Mean	SD	Mean	SD	Mean	SD	Mean	SD	Mean	SD	Mean	SD	Mean	SD	Mean	SD	Mean	SD	Mean
Ben Dorain	564.16	77.783	4347.2	340.012	27.7962	1.54096	117.485	18.0119	5056.64	405.717	344.278	68.3583	11714.4	285.492	8306.82	291.079	20365.5	524.524	197.717	9.23628	723.57	4.36126	9.87275	0.258074	931.159	11.954	86.1473	11.3795	620.638	58.5416	15.5072	0.292975	14.9559	0.235045	737.249	66.7508	6.95001	0.377273	5.68518	0.35022	12.6352	0.673515	15.6992	1.55782	6.04885	0.208707	21.7481	1.71509	8.35264
Ben Gairn	281.99	29.3915	3281.81	359.194	29.3859	0.749859	67.3898	33.0037	3660.58	399.765	450.396	34.8267	9914.05	267.649	7512.76	81.8089	17877.2	378.003	252.988	64.9661	757.076	131.178	10.4709	1.15489	1020.53	186.934	91.0944	19.112	547.836	94.9765	0	0	14.1028	0.596826	653.034	111.222	7.76856	1.08005	10.758	1.77175	18.5266	2.78243	18.6083	2.89	6.01488	0.415575	24.6232	3.26633	6.2049
Ben Hope	445.891	78.8517	2087.71	113.728	24.0781	4.24237	168.985	41.5382	2726.67	219.415	503.909	69.6236	11256.9	1033.81	7276.44	1068.18	19037.2	2053.83	134.98	15.1041	556.116	29.3542	8.60849	0.7235	699.705	43.9154	62.7479	3.90888	474.441	13.8154	15.9915	0.570045	15.3616	0.610442	568.542	18.4614	6.22261	0.282531	0	0	6.22261	0.282531	11.5893	0.791289	5.86336	0.290701	17.4526	1.0195	7.78579
Ben Starav	358.275	46.7574	4232.22	326.34	30.1603	3.52911	126.467	5.34703	4747.12	377.58	991.454	78.899	11521.4	596.072	8051.51	1277.8	20564.3	1783.52	144.435	2.65207	569.016	20.4551	10.2288	0.24721	723.68	21.0185	69.7817	2.49134	485.367	26.6915	15.6269	0.344074	15.9162	0.479626	586.692	29.557	6.86623	0.322659	5.65333	0.132668	12.5196	0.453222	11.6347	0.653651	6.15063	0.37305	17.7853	0.759068	7.96633
Ben Tirran	504.387	20.1425	4401.97	413.495	23.6007	1.7706	233.278	6.885	5163.24	397.773	859.797	244.851	12433	161.985	8849.3	543.381	22142.1	315.059	214.023	10.852	633.461	25.0758	42.9347	3.30847	890.418	33.8171	71.2754	3.35399	462.557	16.3577	17.1924	0.450249	25.9931	0.944649	577.018	18.3771	7.17133	0.142735	5.96835	0.144755	13.1397	0.240518	13.8534	0.839853	7.94874	0.524194	21.8022	1.35557	7.57883
Ben Tron	264.87	24.9189	3221.64	167.388	15.6302	2.71981	77.7464	9.96045	3579.89	202.149	50.3427	13.1503	11478.3	247.852	8057.31	145.065	19586	262.588	259.398	27.5745	1294.51	69.3534	19.883	0.533162	1573.79	96.7418	95.5209	5.43705	881.187	27.7217	19.6093	0.108713	20.9223	0.301513	1017.24	30.8179	9.18667	0.507185	7.30825	0.265965	16.4949	0.772724	37.4211	3.89321	8.17812	0.0622677	45.5992	3.95188	9.50145
S 18/2/23	362.719	35.7291	2943.47	179.591	14.371	1.99954	100.105	7.72846	3420.67	222.47	612.517	80.734	7584.63	928.817	5789.46	871.417	13986.6	1792.2	92.9263	11.6265	221.083	23.4388	7.69298	0.649524	321.703	35.7076	46.2334	2.6572	214.381	18.9403	14.9881	0.228416	15.0869	0.286345	290.689	21.6205	6.46877	0.309786	0	0	6.46877	0.309786	10.7955	0.650602	5.86901	0.170762	16.6645	0.775782	5.65069
Ben Finlay	453.732	19.5798	2760.79	54.8748	28.077	2.12264	175.995	4.23498	3418.59	33.1827	181.843	24.0344	6809.16	182.479	4306.59	111.147	11297.6	269.592	382.056	37.7193	596.472	50.2025	13.0263	0.30179	991.554	88.2235	239.96	50.6707	684.39	48.8946	18.0232	0.264396	18.894	0.042046	961.267	99.8718	9.60652	0.317082	10.1385	1.71706	19.745	2.03414	17.2834	1.90067	8.24342	0.348583	25.5268	1.55208	8.24947
9154-3	430.091	37.2645	2818.69	116.932	23.7813	3.25475	87.8854	36.0378	3360.45	152.565	226.767	27.4509	8152.41	358.857	5875.17	209.077	14254.4	594.352	78.8608	4.06802	183.777	19.6646	6.08739	0.204398	268.726	22.6991	59.2628	6.01788	239.504	22.596	14.5069	0.378071	14.4614	0.371932	327.735	20.5442	5.87848	0.215939	6.68803	0.704505	12.5665	0.554868	8.65496	0.525519	5.26559	0.121851	13.9206	0.646814	6.39286
Almiai	358.617	31.6785	4031.4	479.817	23.019	3.82033	89.3304	38.8223	4502.37	548.159	47.4028	5.5401	11593.5	1409.23	8360.74	1184.26	20001.6	2587.65	95.891	10.6281	539.968	34.583	14.0269	0.180158	649.886	45.1551	53.4495	6.09597	446.408	41.8229	18.4499	0.408615	20.4092	0.0679782	538.717	47.9591	7.28953	0.181043	6.5447	0.307804	13.8342	0.426754	13.2745	0.835131	6.98498	0.312259	20.2595	0.850737	8.0016
Dainiai	482.84	21.5324	3316.62	342.568	40.8408	3.42832	91.2261	6.5476	3931.52	366.261	1126.99	50.7432	9578.35	843.945	7452.65	534.229	18158	1297.62	219.41	43.928	641.541	73.3661	12.8547	1.16964	873.806	108.734	120.278	27.7167	766.471	104.926	16.3359	0.34918	18.379	0.623921	921.464	130.503	9.56472	0.783635	6.85338	0.572178	16.4181	1.34963	21.627	0.955885	6.20572	0.122843	27.8327	1.04775	12.3515
Gagatai	304.554	58.1505	3423.86	219.297	16.7933	2.64824	33.0903	10.4769	3778.3	195.225	61.7055	9.69766	11184.4	1554.05	8700.95	1170.39	19947	2715.86	133.294	9.79784	660.132	39.9017	13.7415	1.96051	807.168	47.739	76.2538	8.13602	636.841	43.6301	18.1554	0.223482	20.7727	0.79258	752.022	51.197	7.72715	0.192549	6.86999	0.237622	14.5971	0.430171	18.4778	0.641357	6.80769	0.363725	25.2855	1.00508	8.98457
Joniniai	450.648	37.0421	3724.05	57.734	58.0689	10.2891	217.461	31.1002	4450.23	126.059	374.041	50.0319	9944.58	386.549	8285.33	345.663	18604	768.788	66.1278	9.38602	370.368	40.152	9.58604	0.116964	446.082	32.7351	48.9037	13.6366	470.291	69.3483	15.2723	0.514022	16.9632	0.862984	551.43	82.4737	6.5694	0.482953	5.65693	0.306362	12.2263	0.781523	17.6655	1.27765	6.02845	0.145776	23.6939	1.23975	7.83721
Tauriai	385.162	43.6974	4641.07	516.951	29.7786	6.69342	119.282	21.1266	5175.29	522.368	305.07	39.2994	11808.5	1300.96	9959.52	1067.69	22073.1	2355.23	117.119	14.253	311.13	20.6883	8.61252	0.442406	436.862	31.0616	47.8711	4.03037	254.339	18.6578	15.8451	0.42068	16.4441	0.411235	334.499	21.8918	8.52198	0.12338	5.96727	0.199044	14.4893	0.291037	19.938	2.33737	5.96538	0.224536	25.9034	2.12822	7.60572
Mara	158.044	15.1936	6422.25	366.858	8.97726	2.36518	63.6253	2.65908	6652.9	382.228	51.857	3.22193	11634.3	732.394	8535.71	810.892	20221.9	1307.4	95.0757	11.1275	441.195	36.127	13.3841	0.908697	549.655	45.9101	38.3476	2.34787	251.589	21.7586	19.5502	0.207199	20.1218	0.274289	329.609	24.2402	7.77806	0.0770011	7.23056	0.152771	15.0086	0.228811	15.7879	1.72563	7.19605	0.0704907	22.984	1.78402	7.63805
Marski	338.357	44.7206	3437.58	142.692	27.7159	2.49149	28.7389	8.01429	3832.39	181.182	413.923	34.2318	10622.3	999.696	9118.17	734.417	20154.4	1708.54	239.057	101.797	725.247	293.403	17.3877	6.00158	981.692	401.045	64.2525	20.7947	401.581	168.479	18.1069	1.48222	18.3035	1.59072	502.244	192.331	8.30045	1.15093	0	0	8.30045	1.15093	16.2106	4.80964	7.11597	0.718608	23.3266	5.5258	6.84228
Mikael	231.404	32.2286	3630.21	293.927	19.4193	3.12121	37.4835	13.6585	3918.52	341.385	229.864	16.1755	10769.9	666.826	9232.82	447.674	20232.6	1124.9	110.932	13.0118	265.894	17.2295	9.68737	0.77698	386.513	29.8403	93.6064	6.94703	564.204	2.125	15.3071	0.624065	17.0145	0.518156	690.132	9.90674	7.57867	0.42516	5.52269	0.11613	13.1014	0.540813	10.4353	0.980827	5.65718	0.244306	16.0925	0.848697	5.96103
Mortti	355.431	73.1629	2826.82	32.236	23.7009	6.02102	62.3642	31.2605	3268.31	92.7363	560.123	27.5249	10744.8	839.351	8805.2	1023.94	20110.1	1858.59	104.179	24.9081	339.928	86.6842	8.6628	0.408597	452.77	111.989	40.0307	5.91549	241.437	57.2094	14.4253	0.405583	14.6236	0.30091	310.517	63.7191	6.30093	0.480288	5.119	0.160498	11.4199	0.638539	9.59287	1.6707	5.35577	0.13805	14.9486	1.80751	6.1975
Vilma	237.643	30.2191	2761.26	258.206	22.6269	1.80044	68.1451	2.92248	3089.67	232.514	466.759	49.5103	12066.4	189.413	9755.95	210.115	22289.1	337.109	0	0	0	0	0	0	0	0	0	0	0	0	0	0	0	0	0	0	0	0	0	0	0	0	0	0	0	0	0	0	0
Venny	290.295	41.2245	3285.85	366.199	42.893	3.5524	94.9459	7.3223	3713.99	396.384	92.207	13.5952	9622.78	204.718	6885.4	176.906	16600.4	354.19	0	0	0	0	0	0	0	0	0	0	0	0	0	0	0	0	0	0	0	0	0	0	0	0	0	0	0	0	0	0	0
Tisel	354.165	3.42659	2408.24	293.393	35.3432	1.39488	249.163	8.17841	3046.91	293.789	1676.1	174.674	10619.7	454	8261.66	434.997	20557.5	1057.91	177.084	2.83654	436.537	37.2989	5.51986	0.166746	619.141	39.9687	86.506	3.11118	523.755	54.9547	13.9801	0.161071	13.2909	0.378469	637.532	57.8485	8.97409	0.00604896	6.30572	0.391685	15.2798	0.397734	24.3251	1.27098	5.42087	0.175204	29.7459	1.44619	9.69499
[truncated: 111 more columns]
